# Supplementary material
Source: publisher figshare collection journal article supplement (https://tandf.figshare.com/ndownloader/files/15191543)
Supplement: Supplementary file 1 [file 15191543]

## Sheet: RC Dates
Site (Site #)	Lab #	Material	Conventional 14C Age (BP)	cal BC/AD*	P (%)	Reference	Context	Technique	Fraction Modern	±	D14C (‰)	±
Pearls (A-1)	UGa [A1-B2]^	shell (Astraea sp.)	1914 ± 51	315-605**	95.4	Cody 1991:594	Unit B, 75-80 cmbd (55-60 cmbs, 15-20cm bo)	not specified
La Fillette (A-11)	PSUAMS-1565	charcoal	1215 ± 20	720-745 765-885	8.3 87.1		STP1-SS4, ~2mbs (top of concentration)	AMS	0.8598	0.0017	-140.2	1.7
La Tante (D-4)	Beta-85939	charcoal	770 ± 60	1050-1080 1150-1310 1360-1390	2.0 90.4 3.0	Cody 1998:246	118.5S/36W, 85-110 cmbs	radiometric
Grand Anse (G-7)	[UNK, G7-1]^	shell (Labatus sp.)	1520 ± 80	685-1020**	95.4	Banks 1988	Unknown Unit, 38 cmbs	not specified
St. John's River (G-8)	UCIAMS-179806	shell (Anadara sp.)	1380 ± 20	905-1060**	95.4		G8-P3-Final STP(2), Unit 3, 64-82cmbs	AMS	0.8424	0.0017	-157.6	1.7
Salt Pond (G-21)	PSUAMS-1320	charcoal	1180 ± 25	770-900 925-945	91.0 4.4		Locus 2, STP7-SS3, 14-25 cmbs	AMS	0.8632	0.0022	-136.8	2.2
Beausejour (G-34)	PSUAMS-1317	charcoal	1685 ± 20	260-280 325-410	4.6 90.8		STP1-SS4, 80-90 cmbs (w/~10cm overburden)	AMS	0.8109	0.0016	-189.1	1.6
Duquesne (M-3)	Beta-98365	charcoal	1080 ± 50	775-795 805-845 860-1035	1.4 2.7 91.2	Cody 1998:246	5N/5W, lower profile (40-60cmbs)	AMS
Montreuil (P-2)	PSUAMS-3946	charcoal	1215 ± 20	720-745 765-885	8.3 87.1		Unit A-6d-SS8, 56 cmbs	AMS	0.8598	0.0016	-140.2	1.6
Savanne Suazey (P-3)	Beta-85935	charcoal	1110 ± 40	775-795 805-845 860-1020	2.2 3.7 89.5	Cody 1998:246	southern locus, 5N/17W, posthole, 15-31 cmbs	radiometric
Sauteurs Bay (P-5)	Beta-85941	charcoal	1270 ± 50	660-780 785-880	73.3 22.1	Cody 1998:246	Locus 3, SC ("locus SW")	AMS
High Cliff Point (P-7)	PSUAMS-3945	charcoal	380 ± 25	1445-1525 1570-1630	66.8 28.6		STP12-SS3, 22-30 cmbs	AMS	0.9538	0.0025	-46.2	2.5
